# Supplementary material
Source: Springer Nature journal article supplement (https://www.springermedizin.de/resource/supplementary/12947_2013_482_MOESM7_ESM.pdf/9555846)
Supplement: MOESM7 [file 9555846]

# Regional longitudinal strain

Temporal smoothing  
■ minimum  
■ factory default  
■ maximum

**A**

Anterior wall

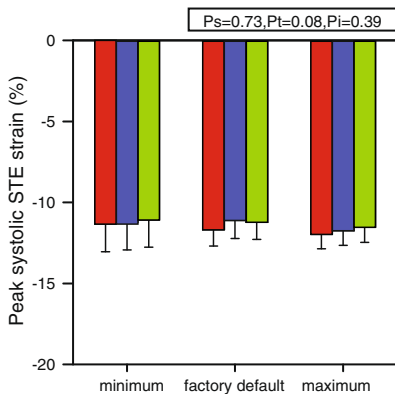

**B**

Posterior wall

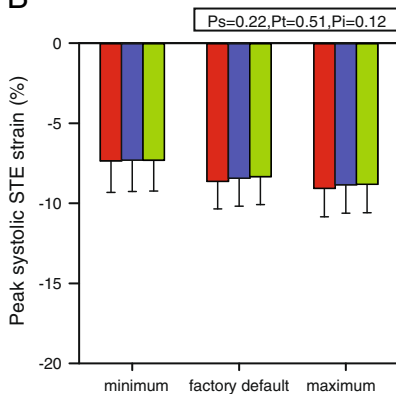

**C**

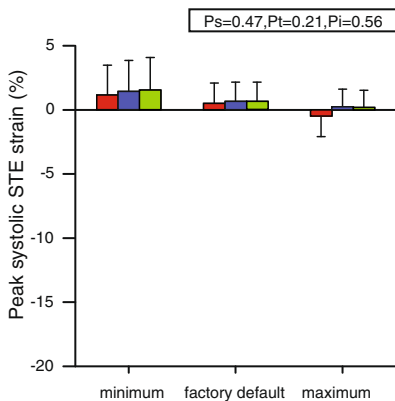

**D**

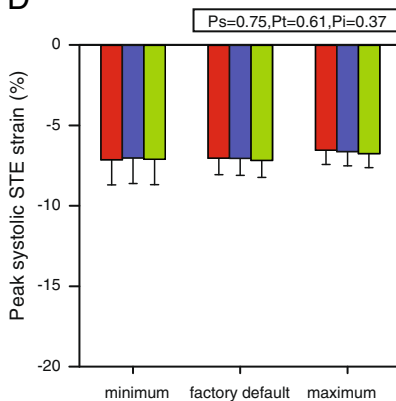

**E**

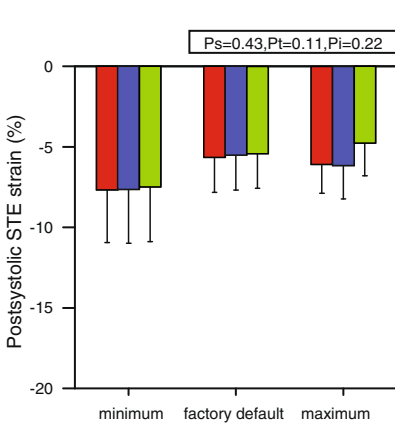

**F**

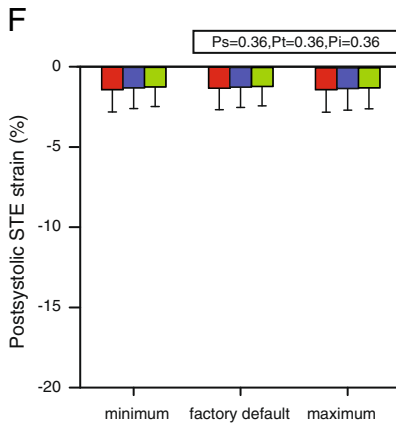

Occlusion

Spatial smoothing

Spatial smoothing
